# Supplementary material for: lncRNA PCAT6 facilitates cell proliferation and invasion via regulating the miR-326/hnRNPA2B1 axis in liver cancer
Source: PubMed Central journal article supplement — Oncol Lett. 2021 Apr 13;21(6):471. doi: 10.3892/ol.2021.12732 (PMC8063269; doi:10.3892/ol.2021.12732), 2021-04-13

Figure S1. Transfection results. Reverse transcription-quantitative PCR was performed to detect the expression of PCAT6 and miR-326 in both HepG2 and Huh7 cells transfected with (A) miR-326 mimic, (B) pcDNA3.1-PCAT6 or (C) miR-326 inhibitor. Protein level of hnRNPA2B1 in both (D) HepG2 and (E) Huh7 cells transfected with hnRNPA2B1 shRNA or non-targeting shRNA control was examined using western blotting. \*\*\*P<0.001 compared with respective control. PCAT6, prostate cancer-associated transcript 6; miR-, microRNA; hnRNPA2B1, heterogeneous nuclear ribonucleoprotein A2B1; sh-, short hairpin.

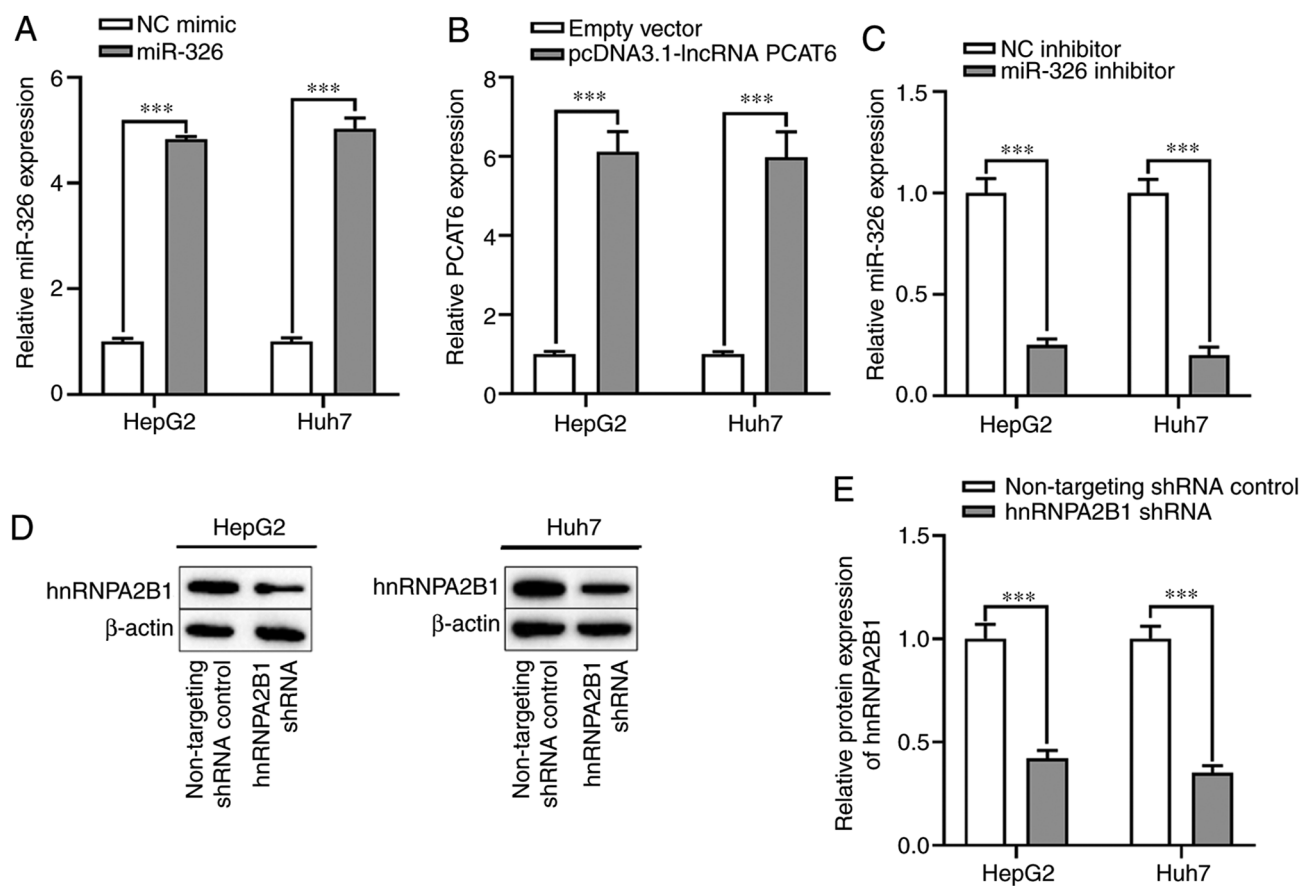

Supplement: Supplementary_Data.pdf [file Supplementary_Data.pdf]
